# Supplementary material
Source: publisher figshare collection journal article supplement (https://acs.figshare.com/ndownloader/files/8975080)
Supplement: Supplementary file 1 [file 8975080]

# Supporting Information

## **Directional solvent vapor annealing for crystal alignment in solution processed organic semiconductors**

*Deepak Bharti, Vivek Raghuwanshi, Ishan Varun, Ajay Kumar Mahato, and Shree Prakash Tiwari\**

Department of Electrical Engineering, Indian Institute of Technology Jodhpur, Jodhpur,  
Rajasthan, India, 342011

\* Email: [sptiwari@iitj.ac.in](mailto:sptiwari@iitj.ac.in)

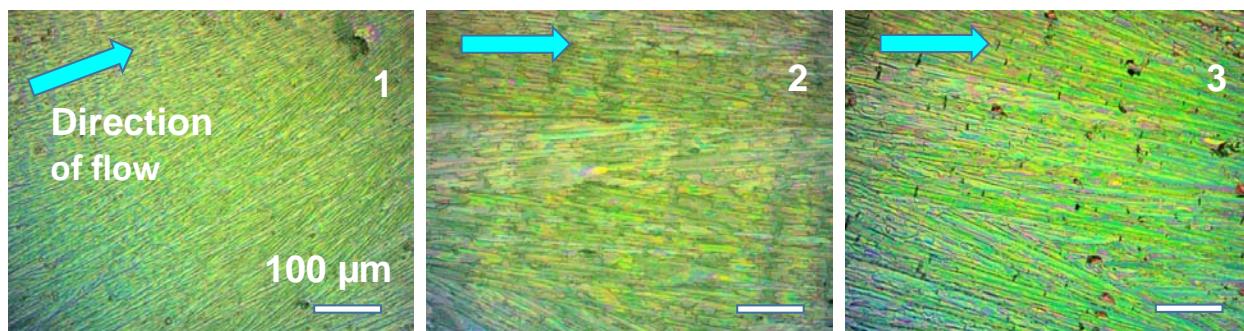

**Figure S1.** Morphology of TIPS-pentacene films at  $d_{s,i} = 6.5''$ ,  $h_{c,i} = 2$  mm and  $f_{t,i} = 5$  L/min in three different batches.

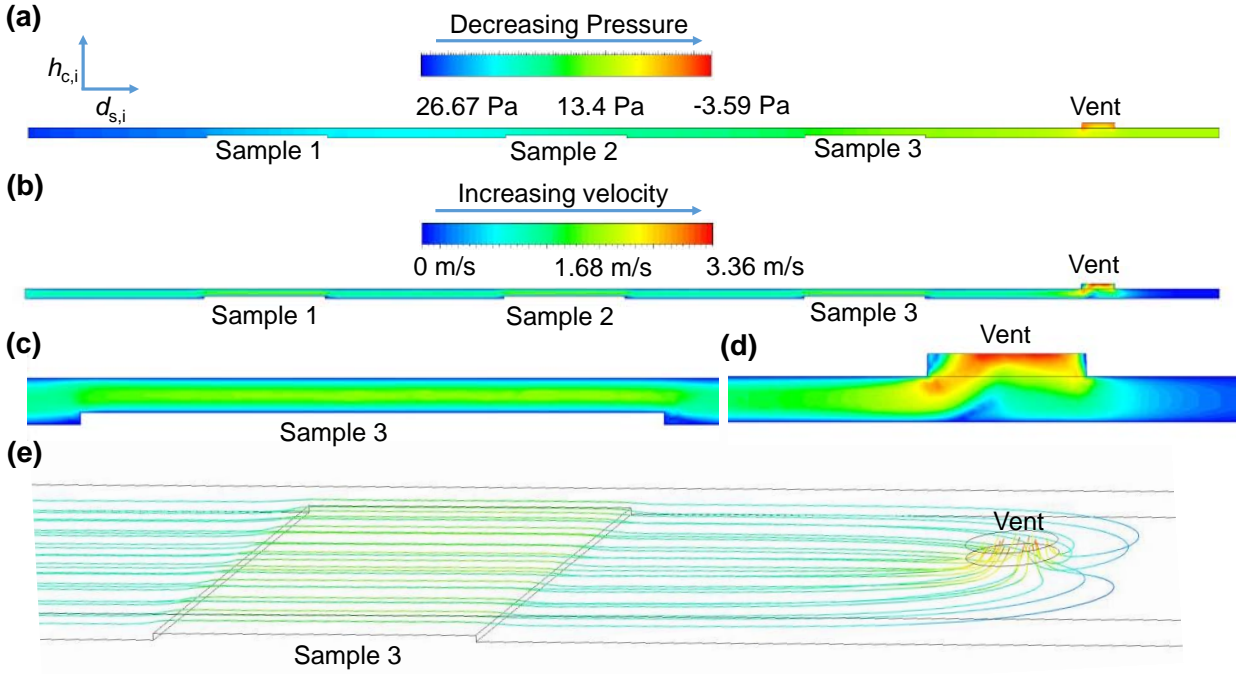

**Figure S2.** CFD simulation results showing pressure variation (a), and velocity variation (b) in the interaction tube for  $h_{c,i} = 2$  mm. A closer view of velocity profile over sample surface (c), and near the vent opening (d). (e) Velocity streamlines in the interaction tube.

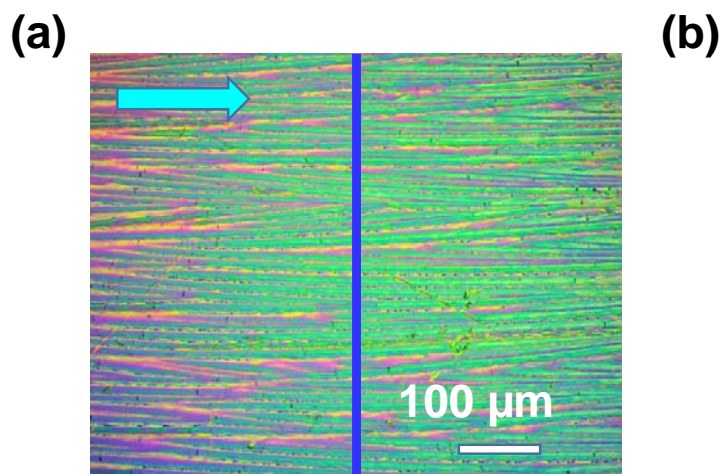

**Figure S3.** An optical micrograph of DSV A TIPS-pentacene crystals **(a)**, Line profile along the solid line in the micrograph **(b)**.

### Supplementary Note 1: Calculation of Reynolds number for gas-vapor mixture

Reynolds number which is the ratio of inertial forces to the viscous forces of the fluid can be given as

$$Re = \rho v L / \eta \quad (S1)$$

Where  $\rho$  is the density of the fluid in  $\text{Kg/m}^3$ ,  $v$  is the velocity in  $\text{m/s}$ ,  $L$  is the characteristic linear dimension in  $\text{m}$ , and  $\eta$  is the dynamic viscosity of the fluid in  $\text{Pa.s}$ .

To estimate the Reynolds number, the gas-vapor mixture has been assumed as an ideal binary mixture, i.e. excess volume of mixing is zero and component of mixture are non-reacting. In the this case of ideal binary mixture of nitrogen and toluene, dynamic viscosity of the mixture,  $\eta_m$  can be given from Arrhenius equation as following,

$$\ln(\eta_m) = X_{N_2} \ln(\eta_{N_2}) + X_{Tol} \ln(\eta_{Tol}) \quad (S2)$$

Similarly density of the mixture  $\rho_m$  can be given as,

$$\rho_m = X_{N_2} \rho_{N_2} + X_{Tol} \rho_{Tol} \quad (S3)$$

Where  $X_{N_2}$  and  $X_{Tol}$  are the mole fraction of the components,  $\eta_{N_2}$  and  $\eta_{Tol}$  are the dynamic viscosities of pure components and  $\rho_{N_2}$  and  $\rho_{Tol}$  are the densities of the pure components<sup>1</sup>.

Values of dynamic viscosity of nitrogen and toluene are  $1.81 \times 10^{-5} \text{ Pa.s}$  and  $5.6 \times 10^{-4}$  respectively. Values of density of nitrogen and toluene are  $1.165 \text{ Kg/m}^3$  and  $867 \text{ Kg/m}^3$  respectively.

Considering  $L$  as  $3.175 \times 10^{-2} \text{ m}$  (width of interaction tube) and  $v$  as  $1.68 \text{ m/s}$ , in the absence of toluene vapors ( $X_{Tol}=0$ ), substituting equation S2 and S3 in S1 yields a Reynolds number of 3433, which indicates a transitional flow in the interaction zone. Even a small quantity of solvent ( $X_{Tol}=0.05$ ) results into a large value of Reynolds number of 110000, making the flow of this

gas-vapor mixture completely turbulent. With increasing toluene content in the mixture, turbulence of the mixture is set to increase.

## Reference

1. Viswanath, D. S.; Ghosh, T. K.; Prasad, D. H. L.; Dutt, N. V. K.; Rani, K. Y. VISCOSITIES OF SOLUTIONS AND MIXTURES. In *Viscosity of Liquids: Theory, Estimation, Experiment, and Data*, Springer Netherlands: Dordrecht %@ 978-1-4020-5482-2, **2007**, pp 407-442.
